# Supplementary material
Source: publisher site journal article supplement (https://www.dovepress.com/article/372328)

**Supplemental Files**

**Supplement 1 Kaplan-Meier survival curves in the testing group.**

**(A)**, Age; **(B)**, Race; **(C)**, Grade; **(D)**,FIGO; **(E)**, Chemotherapy; **(F)**,LODDS.


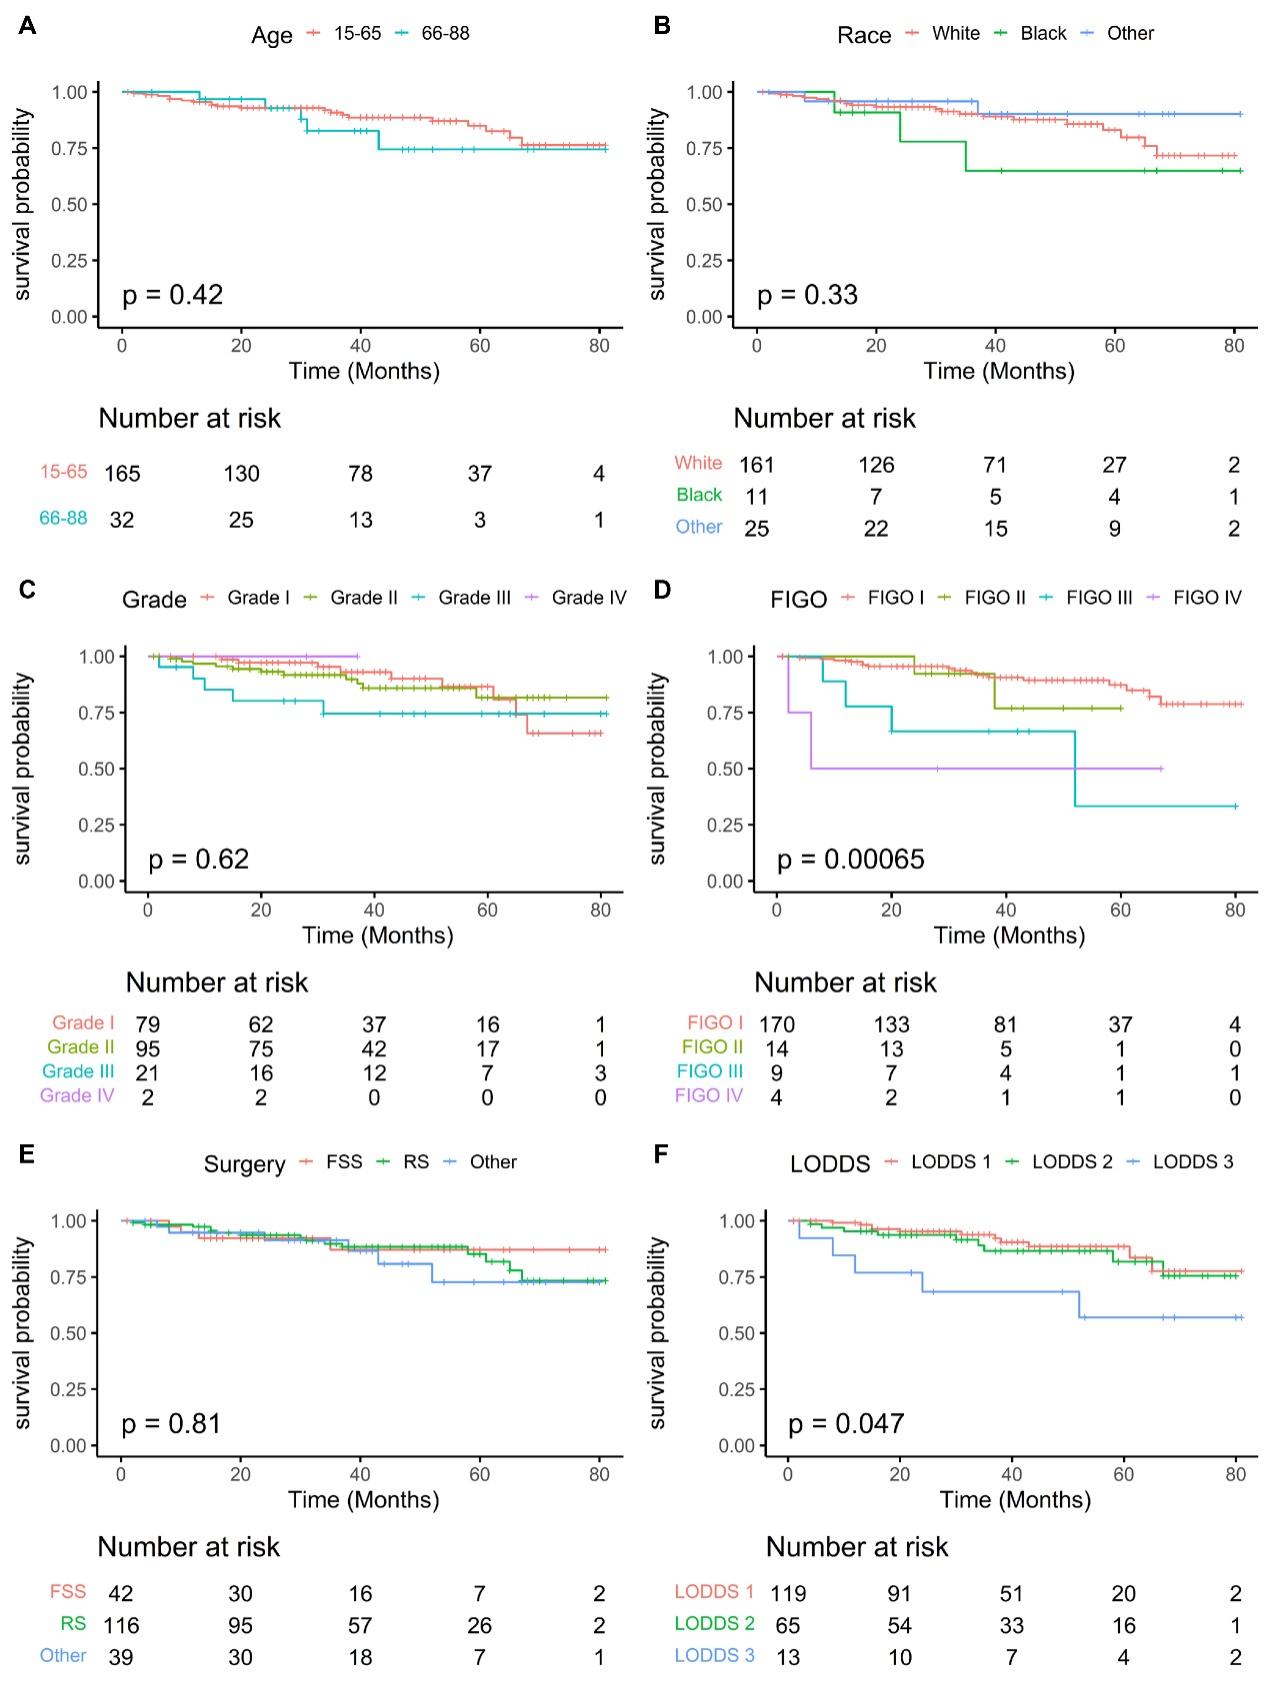

Supplement: Supplementary file 1 [file get_supplementary_file.php]
